# Supplementary material for: One-dimensional cobalt(ii) coordination polymer featuring single-ion-magnet-type field-induced slow magnetic relaxation
Source: Royal Society of Chemistry journal article supplement (doi:10.1039/c8nj01236a), 2018-01-01
Supplement: c8nj01236a1.pdf [file c8nj01236a1.pdf]

## Supporting Information

### **One-dimensional cobalt(II) coordination polymer featuring single-ion-magnet-type field-induced slow magnetic relaxation**

Xiangyu Liu,<sup>a\*</sup> Xiufang Ma,<sup>a</sup> Peipei Cen,<sup>a</sup> Fengqing An,<sup>a</sup> Zheng Wang,<sup>a</sup> Weiming Song,<sup>a</sup> Yi-Quan Zhang<sup>b\*</sup>

[a] State Key Laboratory of High-efficiency Utilization of Coal and Green Chemical Engineering, College of Chemistry and Chemical Engineering, Ningxia University, Yinchuan 750021, China

[b] Jiangsu Key Laboratory for NSLSCS, School of Physical Science and Technology, Nanjing Normal University, Nanjing 210023, China

**\*Corresponding author**

**Tel.: +86-951-2062004**

**Fax: +86-951-2062860**

**E-mail: [xiangyuliu432@126.com](mailto:xiangyuliu432@126.com)**

**\*Corresponding author**

**Dr. Yi-Quan Zhang**

**E-mail: [zhangyiquan@njnu.edu.cn](mailto:zhangyiquan@njnu.edu.cn)**

## Table of contents

**Table S1.** Crystal data and structure refinement summary for compound **1**.

**Table S2.** Selected bond lengths (Å) and bond angles (°) for **1**.

**Table S3.** Relaxation fitting parameters from least-squares fitting of  $\chi(f)$  data under 1200 Oe dc field of **1**.

**Table S4.** ZFS parameters and relaxation parameters with easy-axis anisotropy of octahedral Co(II) ion.

**Table S5.** Calculated energy levels ( $\text{cm}^{-1}$ ),  $\mathbf{g}$  ( $g_x, g_y, g_z$ ) tensors of the ground doublets of the  $\text{Co}^{\text{II}}$  by CASSCF (**a**) and CASPT2 (**b**).

**Table S6.** Calculated spin-free energies ( $\text{cm}^{-1}$ ) of the lowest ten terms ( $S = 3/2$ ) of the  $\text{Co}^{\text{II}}$  by CASSCF (**a**) and CASPT2 (**b**).

**Table S7.** Calculated weights of the five most important spin-orbit-free states for the lowest two spin-orbit states of the  $\text{Co}^{\text{II}}$  by CASSCF (**a**) and CASPT2 (**b**).

**Figure S1.** 3D supramolecular structure of **1**.

**Figure S2.** PXRD patterns for compound **1**.

**Figure S3.** The ac magnetic susceptibility measurements for **1** in 0 Oe static field.

**Figure S4.** Plot of  $\chi''_{\text{M}}$  vs  $H$  for compound **1** at 5 K.

**Figure S5.** Calculated complete structure (**a**) extracted from complex **1** for CASSCF calculation, and the simplified model structure (**b**) for CASPT2 calculation; H atoms are omitted.

**Table S1.** Crystal data and structure refinement summary for compound **1**.

| compound                                                       | <b>1</b>                                                        |
|----------------------------------------------------------------|-----------------------------------------------------------------|
| Empirical formula                                              | C <sub>32</sub> H <sub>36</sub> CoN <sub>8</sub> O <sub>8</sub> |
| Formula weight                                                 | 719.62                                                          |
| Crystal system                                                 | triclinic                                                       |
| Space group                                                    | <i>P</i> -1                                                     |
| <i>a</i> / (Å)                                                 | 8.6876(6)                                                       |
| <i>b</i> / (Å)                                                 | 8.8285(6)                                                       |
| <i>c</i> / (Å)                                                 | 11.1967(5)                                                      |
| $\alpha$ / (°)                                                 | 74.149(5)                                                       |
| $\beta$ / (°)                                                  | 89.728(5)                                                       |
| $\gamma$ / (°)                                                 | 78.065(6)                                                       |
| <i>V</i> (Å <sup>3</sup> )                                     | 807.04(9)                                                       |
| <i>Z</i>                                                       | 1                                                               |
| Calculated density <i>D<sub>e</sub></i> / mg · m <sup>-3</sup> | 1.481                                                           |
| Absorption coeff. ( $\mu$ ) mm <sup>-1</sup>                   | 0.597                                                           |
| <i>F</i> (000)                                                 | 375                                                             |
| <i>R</i> ( <i>int</i> )                                        | 0.0262                                                          |
| $\theta$ range / (°)                                           | 2.97 to 29.14                                                   |
| Reflections collected / unique                                 | 10791 / 3768                                                    |
| Parameters refined                                             | 231                                                             |
| Final <i>R</i> indices [ <i>I</i> >2 $\sigma$ ( <i>I</i> )]    | <i>R</i> <sub>1</sub> = 0.0348, <i>wR</i> <sub>2</sub> = 0.0814 |
| <i>R</i> indices (all data)                                    | <i>R</i> <sub>1</sub> = 0.0421, <i>wR</i> <sub>2</sub> = 0.0862 |
| Temp.(K)                                                       | 293(2)                                                          |

**Table S2.** Selected bond lengths (Å) and bond angles (°) for **1**.

| <b>1</b>   |            |                   |            |                   |            |
|------------|------------|-------------------|------------|-------------------|------------|
| Co(1)-O(4) | 2.0901(13) | N(6)-C(5)         | 1.337(2)   | O(4A)-Co(1)-N(6)  | 91.91(5)   |
| Co(1)-O(2) | 2.0981(11) | C(2)-C(3)         | 1.466(2)   | C(6)-N(6)-Co(1)   | 122.88(11) |
| Co(1)-N(6) | 2.1488(14) | O(7)-C(3)         | 1.361(2)   | O(2)-C(1)-O(3)    | 124.49(14) |
| O(2)-C(1)  | 1.2463(19) | O(2)-Co(1)-N(6)   | 92.68(5)   | O(2A) -Co(1)-O(2) | 180.0      |
| O(3)-C(1)  | 1.266(2)   | C(1)-O(2)-Co(1)   | 131.20(10) | O(4A) -Co(1)-O(4) | 180.00(2)  |
| C(1)-C(8)  | 1.520(2)   | O(4A)-Co(1)-O(2A) | 86.15(5)   | N(6)-Co(1)-N(6A)  | 180.0      |

**Table S3.** Relaxation fitting parameters from least-squares fitting of  $\chi(f)$  data under 1200 Oe dc field of **1**.

| $T(K)$ | $\chi_T$ | $\chi_S$ | $\alpha_1$ | $\alpha_2$ |
|--------|----------|----------|------------|------------|
| 2      | 2.221    | 0.186    | 0.0008     | 0.280      |
| 2.2    | 1.861    | 0.128    | 0.0014     | 0.264      |
| 2.5    | 1.820    | 0.124    | 0.0032     | 0.241      |
| 2.8    | 1.776    | 0.121    | 0.0065     | 0.195      |
| 3      | 1.668    | 0.111    | 0.0087     | 0.184      |
| 3.2    | 1.572    | 0.102    | 0.011      | 0.179      |
| 3.5    | 1.515    | 0.595    | 0.019      | 0.153      |
| 3.8    | 1.462    | 0.089    | 0.021      | 0.128      |
| 4      | 0.230    | 0.064    |            | 0.111      |
| 4.2    | 0.219    | 0.060    |            | 0.090      |
| 4.5    | 0.205    | 0.059    |            | 0.044      |
| 4.8    | 0.193    | 0.053    |            | 0.028      |
| 5      | 0.185    | 0.043    |            | 0.032      |
| 5.5    | 0.169    | 0.031    |            | 0.006      |

**Table S4.** ZFS parameters and relaxation parameters with easy-axis anisotropy of octahedral Co(II) ion.

| Compounds                                                      | Chromophere | Calculated value by SHAPE analysis | $D/cm^{-1}$ | DC field/Oe | $U_{eff}/K$ | $\tau_0/s$            |
|----------------------------------------------------------------|-------------|------------------------------------|-------------|-------------|-------------|-----------------------|
| $[Co(H_2L_1)_2] \cdot 2THF^{35a}$                              | $CoN_4O_2$  | 5.54                               | -30.4       | 1000        | 7.3         | $8.4 \times 10^{-6}$  |
| $[Co(HL_2)_2]^{35a}$                                           | $CoN_4O_2$  | 5.91                               | -18.4       | 1000        | 10.2        | $6.1 \times 10^{-6}$  |
| $[Co(H_2L_3)_2] \cdot CH_2Cl_2^{35a}$                          | $CoN_4O_2$  | 4.99                               | -27.4       | 1000        | 14.1        | $1.2 \times 10^{-5}$  |
| $[Co^{III}Co^{II}(LH_2)_2(Cl)(H_2O)] \cdot 4(H_2O)^{35b}$      | $CoN_2O_4$  | 0.856                              | -7.4        | 1000        | 11.4        | $6.1 \times 10^{-6}$  |
| $[Co^{III}Co^{II}(LH_2)_2(Br)(H_2O)] \cdot 4(H_2O)^{35b}$      | $CoN_2O_4$  | 0.742                              | -9.7        | 1000        | 20.8        | $1.0 \times 10^{-6}$  |
| $[Co(dca)_2(bim)_4]^{35c}$                                     | $CoN_6$     | 0.031                              | -69.6       | 2500        | 11.1        | $0.87 \times 10^{-6}$ |
| $[Co(dca)_2(bim)_2]^{35c}$                                     | $CoN_6$     | 0.039                              | -74.3       | 2500        | 13.2        | $1.54 \times 10^{-6}$ |
| $[Co(dca)_2(bmim)_2]^{35c}$                                    | $CoN_6$     | 0.048                              | -75.8       | 2500        | 22.1        | $0.63 \times 10^{-6}$ |
| $\{[(Tpm)Co(DMF)W(CN)_8]_2[Co(DMF)_4] \cdot 2DMF\}^{35d}$      | $CoN_5O$    | --                                 | --          | 500         | 55.1        | $3.8 \times 10^{-10}$ |
| $[Co(3-Hppt)_2(adip)(2H_2O)] \cdot 2H_2O$ <sup>this work</sup> | $CoN_2O_4$  | 0.148                              | -33.9       | 1200        | 38.8        | $6.68 \times 10^{-8}$ |

**Table S5.** Calculated energy levels ( $\text{cm}^{-1}$ ),  $\mathbf{g}$  ( $g_x, g_y, g_z$ ) tensors of the ground doublets of the  $\text{Co}^{\text{II}}$  by CASSCF (**a**) and CASPT2 (**b**).

| <b>a</b>           |              |       | <b>b</b>           |              |       |
|--------------------|--------------|-------|--------------------|--------------|-------|
| $E/\text{cm}^{-1}$ | $\mathbf{g}$ |       | $E/\text{cm}^{-1}$ | $\mathbf{g}$ |       |
| 0.0                | $g_x$        | 1.951 | 0.0                | $g_x$        | 1.937 |
|                    | $g_y$        | 2.899 |                    | $g_y$        | 3.078 |
|                    | $g_z$        | 7.478 |                    | $g_z$        | 7.267 |
| 222.9              | $g_x$        | 1.600 | 223.1              | $g_x$        | 1.581 |
|                    | $g_y$        | 2.333 |                    | $g_y$        | 2.076 |
|                    | $g_z$        | 4.722 |                    | $g_z$        | 5.013 |

**Table S6.** Calculated spin-free energies ( $\text{cm}^{-1}$ ) of the lowest ten terms ( $S = 3/2$ ) of the  $\text{Co}^{\text{II}}$  by CASSCF (**a**) and CASPT2 (**b**).

| spin-free states | <b>a</b>           | <b>b</b>           |
|------------------|--------------------|--------------------|
|                  | $E/\text{cm}^{-1}$ | $E/\text{cm}^{-1}$ |
| 1                | 0.0                | 0.0                |
| 2                | 331.0              | 418.7              |
| 3                | 1008.6             | 1078.8             |
| 4                | 7618.1             | 8513.9             |
| 5                | 7886.6             | 8766.9             |
| 6                | 8189.8             | 9129.9             |
| 7                | 16543.8            | 18412.1            |
| 8                | 22509.3            | 20394.6            |
| 9                | 23328.9            | 20957.6            |
| 10               | 24705.7            | 22739.8            |

**Table S7.** Calculated weights of the five most important spin-orbit-free states for the lowest two spin-orbit states of the  $\text{Co}^{\text{II}}$  by CASSCF (**a**) and CASPT2 (**b**).

| methods | Spin-orbit states | Energy( $\text{cm}^{-1}$ ) | Spin-free states, Spin, Weights |              |              |              |               |
|---------|-------------------|----------------------------|---------------------------------|--------------|--------------|--------------|---------------|
|         |                   |                            | 1,1.5,0.6576                    | 2,1.5,0.2748 | 3,1.5,0.0645 | 6,1.5,0.0011 | 21,0.5,0.0006 |
| CASSCF  | 1                 | 0.0                        | 1,1.5,0.6576                    | 2,1.5,0.2748 | 3,1.5,0.0645 | 6,1.5,0.0011 | 21,0.5,0.0006 |
|         | 2                 | 222.9                      | 1,1.5,0.8412                    | 2,1.5,0.1124 | 3,1.5,0.0415 | 5,1.5,0.0019 | 6,1.5,0.0010  |
| CASPT2  | 1                 | 0.0                        | 1,1.5,0.6994                    | 2,1.5,0.2357 | 3,1.5,0.0618 | 6,1.5,0.0009 | 22,0.5,0.0006 |
|         | 2                 | 223.1                      | 1,1.5,0.8711                    | 2,1.5,0.0867 | 3,1.5,0.0376 | 5,1.5,0.0015 | 6,1.5,0.0010  |

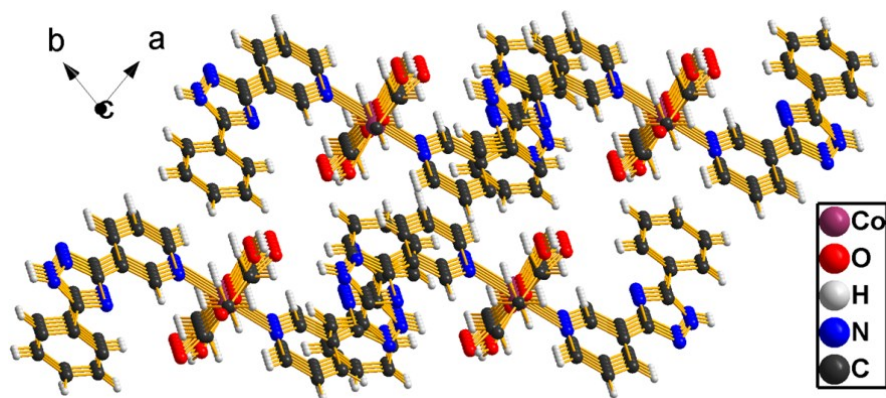

**Figure S1.** 3D supramolecular structure of **1**.

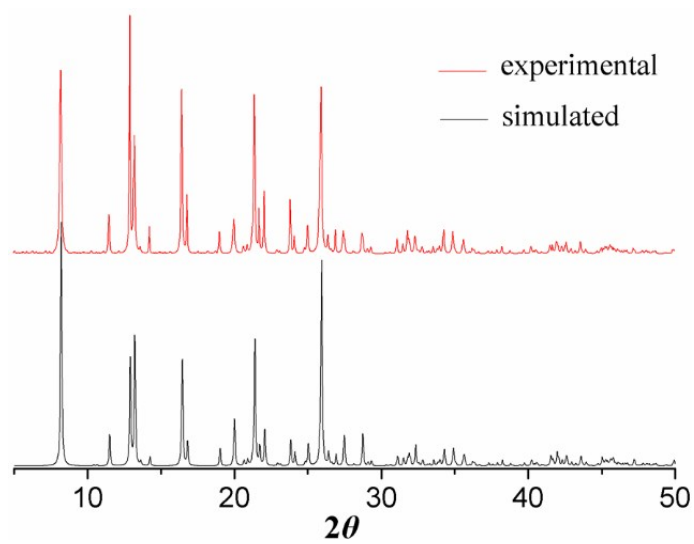

**Figure S2.** PXRD patterns for compound **1**.

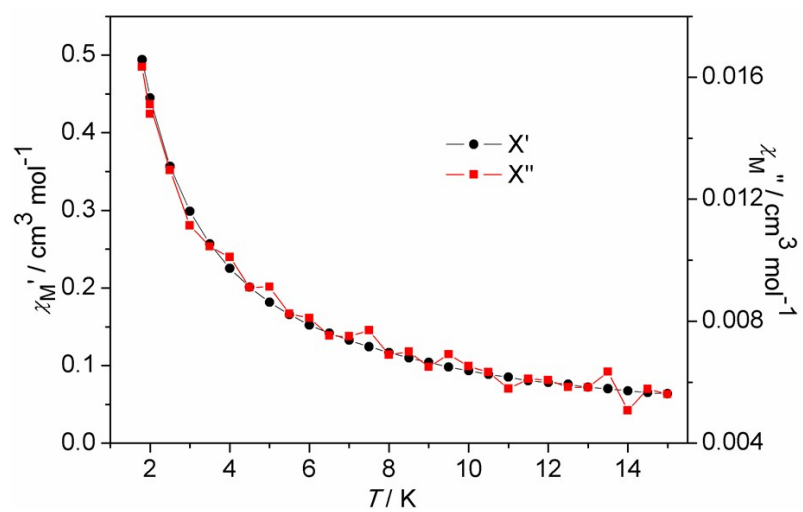

**Figure S3.** The ac magnetic susceptibility measurements for **1** in 0 Oe static field.

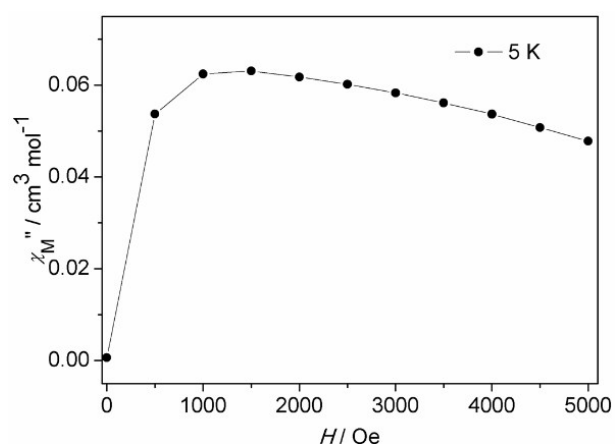

**Figure S4.** Plot of  $\chi''_M$  vs  $H$  for compound **1** at 5 K.

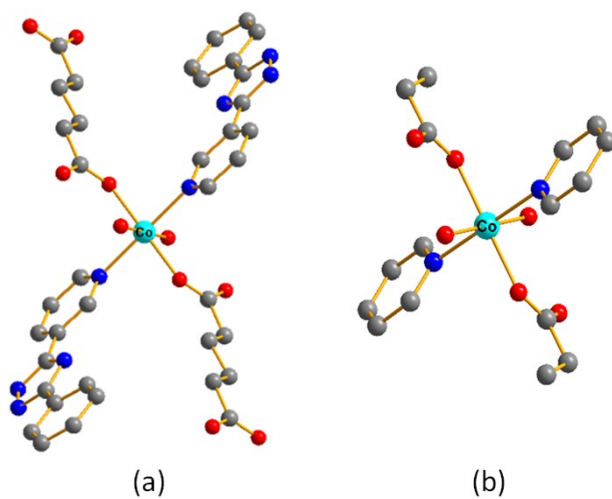

**Figure S5.** Calculated complete structure (*a*) extracted from complex **1** for CASSCF calculation, and the simplified model structure (*b*) for CASPT2 calculation; H atoms are omitted.
